# Supplementary material for: Regional Anesthetic and Analgesic Techniques for Clavicle Fractures and Clavicle Surgeries: Part 1—A Scoping Review
Source: MDPI journal article supplement (doi:10.3390/healthcare10081487), 2022-08-07
Supplement: s1 [file s1]

**Table S2.** A summary of case report/case series included in this scoping review. References [9,10,14–16,20,22,26–30,32–34,38–42,46,47,49–52,59,60] are cited in supplementary. Abbreviations: ICPB, Intermediate Cervical Plexus Block; ISB, Interscalene Brachial Plexus Block; CPB, Clavipectoral Plane Block; COX, Cyclooxygenase, RCT, Randomized Controlled Trial; LA, Local Anesthetic; NR, Not Reported; SCPB, Superficial Cervical Plexus Block; SpC, Supraclavicular Brachial Plexus Block; WALANT, Wide-Awake Local Anesthesia no Tourniquet; DCP, Deep Cervical Plexus; SpN, Supraclavicular Nerve; GA, General Anesthesia; NB, Nerve Block; ACJ, Acromioclavicular Joint; PECS, Pectoralis Nerve; VAS, Visual Analogue Scale; NRS, Numerical Rating Scale; POD, Postoperative Day; PCA, patient controlled analgesia; IV, Intravenous.

| Reference (year), country | Study design | Sample size | Fracture Location      | Type of Block                | Needle guidance | LA type and volume                                                                                                 | Anesthetic Technique | Multimodal analgesia regime | Outcome(s)                                                                                                                                         |
|---------------------------|--------------|-------------|------------------------|------------------------------|-----------------|--------------------------------------------------------------------------------------------------------------------|----------------------|-----------------------------|----------------------------------------------------------------------------------------------------------------------------------------------------|
| [9]                       | Case report  | 1           | Distal                 | Superior trunk block         | US              | 8mL Ropivacaine 0.75%                                                                                              | Sedation             | Paracetamol, ketorolac 30mg | Comfortable intraoperatively.                                                                                                                      |
| [10]                      | Case report  | 1           | Proximal               | SpN and Superior trunk block | US              | SpN: 2mL Ropivacaine 0.75%<br>Superior trunk block: 10mL Ropivacaine 0.75%                                         | GA                   | NR                          | 1. No intra-operative opioids.<br>2. No pain in recovery.                                                                                          |
| [14]                      | Case report  | 1           | Midshaft               | CPB                          | US              | 30mL Ropivacaine 0.25% and Lignocaine 1%                                                                           | Awake                | Paracetamol, PCA fentanyl   | 1. Pre-operative NRS 8/10 pre-block to 0/10 post-block.<br>2. Pain scores NRS ≤4/10 up to 24 hours post-operatively.<br>No reported complications. |
| [15]                      | Case report  | 1           | NR                     | SCPB and CPB                 | US              | SCPB: NR<br>CPB: 20mL 0.25% Bupivacaine                                                                            | GA                   | Ibuprofen                   | No pain (NRS 0/10) in the post-anesthetic care unit.<br>No pain until 24 hours after surgery.<br>No reported complications.                        |
| [16]                      | Case series  | 7           | NR, 4 ACJ dislocations | PECS II                      | US              | 0.9 to 1.3mg.kg <sup>-1</sup> Bupivacaine 0.375% to 0.5% with Adrenaline or 1.3mg.kg <sup>-1</sup> Levobupivacaine | GA                   | NR                          | 1. All comfortable postoperatively except one case (ACJ dislocation and hook plate) which required rescue Morphine in recovery.                    |

|      |             |    |                         |               |         |                                                                                                                                                                                                                 |          |                               |                                                                                                                                                                                                                          |
|------|-------------|----|-------------------------|---------------|---------|-----------------------------------------------------------------------------------------------------------------------------------------------------------------------------------------------------------------|----------|-------------------------------|--------------------------------------------------------------------------------------------------------------------------------------------------------------------------------------------------------------------------|
| [20] | Case Report | 1  | Midshaft                | CPB           | US      | 0.5% with Adrenaline<br>15mL 0.25% Levobupivacaine and 15mL 1% Lignocaine                                                                                                                                       | Sedation | Paracetamol , COX-2 inhibitor | 1. Surgery under sedation.<br>2. First onset of pain at 16 hours post-block.                                                                                                                                             |
| [22] | Case report | 1  | Midshaft                | WALANT        | LM      | 50mL Lignocaine 1% with Adrenaline and sodium bicarbonate                                                                                                                                                       | Awake    | Naproxen, paracetamol         | No pain intra-operatively                                                                                                                                                                                                |
| [26] | Case series | 20 | 14 Midshaft<br>6 Distal | SpN and C5 NB | US      | SpN: 3mL Bupivacaine 0.5%<br>C5 NB: 3mL Bupivacaine 0.5%                                                                                                                                                        | Awake    | Fentanyl                      | 1. Inadequate anesthesia in 4 (20%) patients.<br>2. One conversion to GA, 3 patients completed surgery with sedation.<br>2. Shoulder weakness in 50% of successful blocks.<br>3. Sensory block duration 5.5 to 12 hours. |
| [27] | Case series | 16 | NS                      | WALANT        | LM      | 40mL Lidocaine 1% with Adrenaline 10 mL subcutaneously along the incision site followed by 30mL subperiosteally at multiple intervals and directions (2mL subperiosteally and 4mL anteriorly, 4 mL posteriorly) | Awake    | NR                            | 1. No pain during surgery except in 2 patients (NRS of 1 to 2) during reduction<br>2. No motor block.<br>3. Analgesia up to 2 hours after surgery                                                                        |
| [28] | Case series | 2  | NR                      | SCPB and CPB  | NR / US | SCPB: NR<br>CBP: 15mL Levobupivacaine 0.375%                                                                                                                                                                    | GA       | NR                            | 1. Minimal post-operative pain (NRS 0-2/10).<br>2. No analgesia used until 13h or next day.                                                                                                                              |

|      |             |    |                                     |                       |            |                                                                                                                           |          |                                     |                                                                                                                                                                 |
|------|-------------|----|-------------------------------------|-----------------------|------------|---------------------------------------------------------------------------------------------------------------------------|----------|-------------------------------------|-----------------------------------------------------------------------------------------------------------------------------------------------------------------|
| [29] | Case series | 4  | Midshaft                            | CPB                   | US         | 10-15mL<br>Levobupivacaine<br>0.4%                                                                                        | GA       | Paracetamol,<br>parecoxib           | Good pain control without<br>intraoperative or postoperative<br>opioid rescue.                                                                                  |
| [30] | Case series | 3  | 1 Medial<br>1 Midshaft<br>1 Distal§ | CPB§                  | US         | CPB: 10-15mL<br>Ropivacaine 0.5%                                                                                          | GA       | NR                                  | No post-operative surgical site<br>pain¶.                                                                                                                       |
| [32] | Case report | 1  | NR                                  | SCPB<br>and SpC       | US         | SCPB: 10mL<br>Bupivacaine 0.5%<br>with 5 mL Lidocaine<br>2%<br>SpC: 5 mL<br>Bupivacaine 0.5%<br>with 5 mL Lidocaine<br>2% | Sedation | NR                                  | No intra-operative pain.                                                                                                                                        |
| [33] | Case report | 1  | Distal                              | SCPB<br>and<br>PECS I | LM /<br>US | SCPB: 5mL<br>Ropivacaine 0.5%<br>PECS I: 15mL<br>Ropivacaine 0.5%                                                         | GA       | Paracetamol<br>and<br>dexketoprofen | Mild post-operative pain (NRS 2-<br>3/10) in recovery.                                                                                                          |
| [34] | Case report | 1  | NR                                  | SCPB<br>and ISB       | US         | SCPB: 10mL<br>Ropivacaine 0.5%<br>ISB: 30mL<br>Ropivacaine 0.5%                                                           | GA       | Paracetamol,<br>hydromorpho<br>ne   | 1. No immediate post-operative pain<br>in recovery<br>2. Hoarseness without dyspnea or<br>Horner's syndrome.<br>3. Discomfort at 15 hours post-<br>operatively. |
| [38] | Case series | 10 | Midshaft                            | SCPB<br>and ISB       | US         | Ropivacaine 0.75%,<br>mean volume<br>30.8mL                                                                               | Sedation | NR                                  | No intra-operative opioids or rescue<br>LA.                                                                                                                     |
| [39] | Case series | 3  | NR                                  | SCPB<br>and ISB       | US         | SCPB: 15mL<br>Bupivacaine 0.25%                                                                                           | Sedation | NR                                  | Comfortable intraoperatively.                                                                                                                                   |

|      |                |   |        |                                           |            |                                                                                                    |                                              |           |                                                                                                                                                                                                                                                                                                                             |
|------|----------------|---|--------|-------------------------------------------|------------|----------------------------------------------------------------------------------------------------|----------------------------------------------|-----------|-----------------------------------------------------------------------------------------------------------------------------------------------------------------------------------------------------------------------------------------------------------------------------------------------------------------------------|
|      |                |   |        |                                           |            | with 2mg<br>Dexamethasone<br>ISB: 25mL<br>Bupivacaine 0.25%<br>with 4mg<br>Dexamethasone           |                                              |           |                                                                                                                                                                                                                                                                                                                             |
| [40] | Case<br>report | 1 | Distal | SpN and<br>ISB                            | US         | SpN: 4mL<br>Bupivacaine 0.5%<br>ISB: 10mL<br>Bupivacaine 0.5%                                      | Awake                                        | NR        | 1. No intra-operative sedatives or<br>analgesics.<br>2. No analgesics in the first 12 hours.                                                                                                                                                                                                                                |
| [41] | Case<br>report | 1 | NR     | SpN and<br>ISB                            | US,<br>PNS | SpN: 5mL<br>Ropivacaine 0.375%<br>ISB: 30mL<br>Ropivacaine 0.375%                                  | Sedation                                     | NR        | 1. No intra-operative pain.<br>2. Ipsilateral vocal cord paralysis,<br>hoarseness, and dysphagia lasting 8-<br>12 weeks.<br>3. During a repeat surgery for<br>implant removal, the procedure was<br>repeated with much smaller<br>volumes with no complications.<br>(4mL for SpN block and 3mL for<br>superior trunk block) |
| [42] | Case<br>report | 1 | ACJ    | SCPB<br>and<br>Superior<br>trunk<br>block | US         | SCPB: 5mL<br>Levopivacaine<br>0.375%<br>Superior trunk<br>block: 12mL<br>Levobupivacaine<br>0.375% | Sedation<br>and<br>subarach<br>noid<br>block | NSAIDS    | 1. Polytrauma patient undergoing<br>concurrent right ACJ repair and<br>right anterior cruciate ligament<br>repair.<br>2. Comfortable intraoperatively,<br>pain-free for 8 hours (site not<br>specified).                                                                                                                    |
| [46] | Case<br>series | 2 | NR     | SCPB<br>and ISB                           | US,<br>PNS | SCPB: 15 to 20mL<br>Ropivacaine 0.25%<br>with 15-30µg<br>Dexmedetomidine                           | Sedation                                     | Ketorolac | Analgesia duration 6 to 10 hours                                                                                                                                                                                                                                                                                            |

|      |             |    |          |                          |         |                                                                                                              |                   |                       |                                                                                                                                                                                            |
|------|-------------|----|----------|--------------------------|---------|--------------------------------------------------------------------------------------------------------------|-------------------|-----------------------|--------------------------------------------------------------------------------------------------------------------------------------------------------------------------------------------|
|      |             |    |          |                          |         | ISB: 24 to 30mL<br>Ropivacaine 0.25%<br>with 30-40µg<br>Dexmedetomidine                                      |                   |                       |                                                                                                                                                                                            |
| [47] | Case report | 1  | Midshaft | SCPB and C5, C6 NB       | US      | SCPB: 5mL<br>Bupivacaine 0.5%<br>C5, C6 NB: 2mL<br>Bupivacaine 0.5%                                          | Sedation          | Fentanyl              | 1. Comfortable intraoperatively.<br>2. Pain-free for 12 hours.                                                                                                                             |
| [49] | Case report | 1  | NR       | SCPB                     | US      | SCPB: 10mL<br>Bupivacaine 0.5%                                                                               | NA                | NR                    | 1. Emergency department report, block performed for analgesia.<br>2. Complete pain relief in 15 minutes, and development of Horner's syndrome in 45 minutes, which resolved in 90 minutes. |
| [50] | Case series | 2  | NR       | Selective C5 NB and SCPB | US      | C5 nerve block: 2mL<br>Ropivacaine 0.5%<br>SCPB: 8mL<br>Ropivacaine 0.5%<br>SCPB: 5mL                        | GA                | Fentanyl              | 1. Minimal intra-operative pain, and NRS <2 in recovery.                                                                                                                                   |
| [51] | Case report | 1* | Midshaft | SCPB and ISB†            | US, PNS | Ropivacaine 0.5%<br>ISB: 15mL<br>Ropivacaine 0.5%                                                            | Sedation          | Paracetamol, tramadol | 1. Pre-operative NRS 7/10 to 0/10 post-block.<br>2. Uneventful surgery.                                                                                                                    |
|      |             | 10 | NR       | ISB                      | NR      | NR                                                                                                           | Sedation or awake | NR                    | NR‡                                                                                                                                                                                        |
| [52] | Case report | 1  | NR       | SCPB and ISB             | US      | SCPB: 15mL<br>Ropivacaine 0.5% and Bupivacaine 0.125%<br>ISB: 5mL<br>Ropivacaine 0.5% and Bupivacaine 0.125% | Awake             | NR                    | Comfortable intraoperatively.<br>Complete motor block of right upper limb.                                                                                                                 |

|      |             |   |        |                                                    |    |                                                                                                                                                                                                                                                               |    |                       |                                                                                                                                                                                             |
|------|-------------|---|--------|----------------------------------------------------|----|---------------------------------------------------------------------------------------------------------------------------------------------------------------------------------------------------------------------------------------------------------------|----|-----------------------|---------------------------------------------------------------------------------------------------------------------------------------------------------------------------------------------|
| [59] | Case report | 1 | Distal | SCPB catheter and C5 NB, then C5 catheter on POD 1 | US | SCPB catheter: 5mL Lignocaine 2% with Adrenaline and 10mL Ropivacaine 0.5%; then 0.2% Ropivacaine 8mL/hour<br>C5 catheter: 2% Lignocaine 3mL with Adrenaline and 8mL 2% Lignocaine; then 4mL/hour**<br>NRS 0/10, intact distal arm motor function on infusion | GA | Fentanyl, paracetamol | 1. Postoperative NRS 3/10 in recovery, then 8-10/10 at 11 hours. No motor block.<br>2. C5 NB nerve block catheter inserted on POD 1, post-block NRS 0/10. Distal arm motor function spared. |
| [60] | Case report | 1 | NR     | SCPB and DCP                                       | NR | Bupivacaine 0.5%.<br>Volumes not reported.                                                                                                                                                                                                                    | GA | NR                    | Pain-free for 14 hours.                                                                                                                                                                     |

\* Pregnant patient at 15 weeks' gestation.

† Interscalene technique described in the manuscript as local anesthetic deposition between superior and middle trunks.

‡ A series of 10 cases of clavicular fixation performed under interscalene block as the sole anesthetic modality was briefly mentioned in this case report by Vandepitte and colleagues with no further details provided.

§ One patient with a distal clavicle fracture had an interscalene catheter inserted in addition to the clavipectoral fascial plane block.

¶ One patient with other accident-related injuries and a pain score of 6/10 required 49.5mg of oral Morphine equivalent in the post-anesthetic care unit.

\*\* Local anesthetic agent and concentration not specified.
