# Supplementary material for: Regional Anesthetic and Analgesic Techniques for Clavicle Fractures and Clavicle Surgeries: Part 1—A Scoping Review
Source: MDPI journal article supplement (doi:10.3390/healthcare10081487), 2022-08-07
Supplement: s1 [file s1]

**Table S1.** Search terms employed in the electronic database search strategy.

| No.                     | Search terms                 |
|-------------------------|------------------------------|
| Clavicle fracture       |                              |
| 1                       | Exp Clavicle/                |
| 2                       | Fracture*.tw                 |
| 3                       | 1 AND 2                      |
| 4                       | Clavic* fracture*.tw         |
| 5                       | 1 OR 3 OR 4                  |
| Regional anesthesia     |                              |
| 6                       | Exp Nerve Block/             |
| 7                       | Regional anesth*.tw          |
| 8                       | Anesth*.tw                   |
| 9                       | Exp Acute Pain/              |
| 10                      | Exp Pain, Postoperative/     |
| 11                      | Exp Analgesia/               |
| 12                      | 6 OR 7 OR 8 OR 9 OR 10 OR 11 |
| Combined search concept |                              |
| 13                      | 5 AND 12                     |
